# Supplementary material for: DNA methylation modulates H19 and IGF2 expression in porcine female eye
Source: PubMed Central journal article supplement (PMC5409778; doi:10.1590/1678-4685-gmb-2016-0194), 2017-03-06
Supplement: 1415-4757-gmb-1678-4685-GMB-2016-0194-Suppl01.pdf [file 1415-4757-gmb-1678-4685-GMB-2016-0194-Suppl01.pdf]

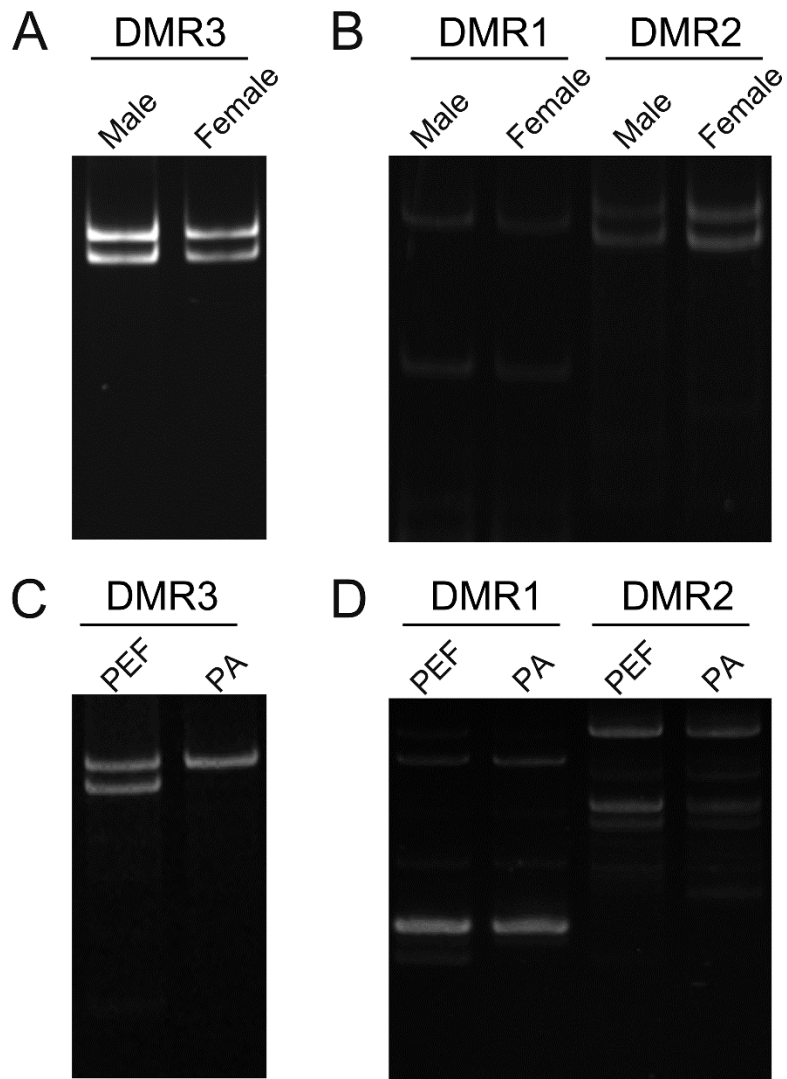

**Figure S1** - Methylation pattern of *H19* DMD and *IGF2* DMRs. For COBRA analysis, the PCR products of *H19* DMD and *IGF2* DMRs were digested with the restriction enzyme Taq I in male and female eye (A and B), and porcine embryonic fibroblast (PEF) and parthenogenetic (PA) cells (C and D), respectively.
